# Supplementary material for: Interfacial charge transfer in black carbon–mineral dust hybrids boosts atmospheric photooxidation
Source: Royal Society of Chemistry journal article supplement (doi:10.1039/d5en00566c), 2025-01-01
Supplement: d5en00566c1.pdf [file d5en00566c1.pdf]

## **Supporting Information (SI)**

### **Interfacial charge transfer at black carbon-mineral dust hybrids boosts atmospheric photooxidation**

**Jiejing Kong<sup>a,b\*</sup>, Yuqing Tang<sup>a,b</sup>, Mingzhu He<sup>a,b</sup>, Jintao Liu<sup>a,b</sup>, Yunlong Guo<sup>a,b</sup>, and Taicheng An<sup>a,b</sup>**

<sup>a</sup> Guangdong-Hong Kong-Macao Joint Laboratory for Contaminants Exposure and Health, Guangdong Key Laboratory of Environmental Catalysis and Health Risk Control, Institute Environmental Health and Pollution Control, Guangdong University of Technology, Guangzhou 510006, China

<sup>b</sup> Guangdong Engineering Technology Research Center for Photocatalytic Technology Integration and Equipment, Guangdong Basic Research Center of Excellence for Ecological Security and Green Development, School of Environmental Science and Engineering, Guangdong University of Technology, Guangzhou 510006, China

Corresponding author: Jiejing Kong (kongjj3@gdut.edu.cn)

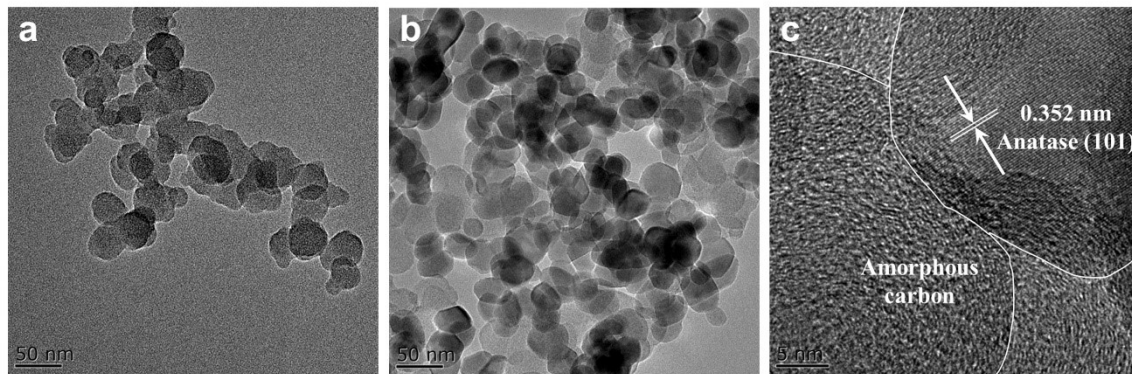

**Figure S1.** TEM (HRTEM) image of (a) BC and (b,c) BC/TiO<sub>2</sub>.

The static contact angle analysis of water droplets on  $\text{TiO}_2$  and  $\text{BC}/\text{TiO}_2$  surfaces reveals distinct differences in hydrophobicity. As shown in **Figure S1a**, the water droplet on the pure  $\text{TiO}_2$  surface exhibits a contact angle of  $25.6^\circ$ , indicating strong hydrophilicity due to the low contact angle and pronounced liquid spreading. Conversely, upon incorporating 10% BC into  $\text{TiO}_2$  (**Figure S1b**), the contact angle increases to  $36.8^\circ$ , marking an approximate 50% enhancement compared to  $\text{TiO}_2$ . This suggests that  $\text{BC}/\text{TiO}_2$  surface exhibits improved hydrophobicity. This observed behavior can be attributed to two key factors: the intrinsic hydrophobic nature of BC and its high specific surface area, which collectively reduce the surface energy of  $\text{TiO}_2$ , thereby enhancing the hydrophobic properties.

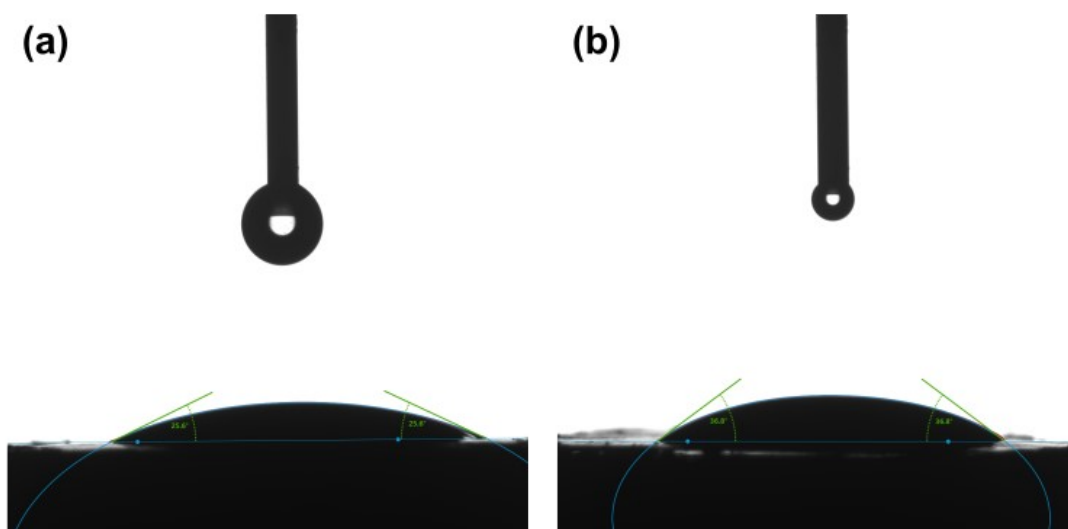

**Figure S2.** Static contact angles of water droplets on (a)  $\text{TiO}_2$  and (b)  $\text{BC}/\text{TiO}_2$  surfaces.

The shift in the XPS valence band maximum (VBM) of the BC/TiO<sub>2</sub>, from 2.60 eV for pristine TiO<sub>2</sub> to 3.75 eV, indicates a downward displacement of the valence band edge relative to the Fermi level (**Figure S3**). This phenomenon is attributed to interfacial charge redistribution, driven by the formation of Ti–O–C bonds between TiO<sub>2</sub> and oxygen-functionalized BC. The electron-withdrawing effect of oxygen atoms (electronegativity = 3.44) within these bonds reduces electron density in the valence band of TiO<sub>2</sub>, thereby lowering its energy position. This downshift in VBM carries two critical implications:

(1) The lowered valence band edge strengthens the thermodynamic driving force for photogenerated holes, improving their ability to oxidize adsorbed species (e.g., converting H<sub>2</sub>O/OH<sup>−</sup> into •OH).

(2) The realignment of energy levels promotes electron transfer from TiO<sub>2</sub> to the conductive BC via Ti–O–C pathways, effectively suppressing charge recombination. This synergizes with the previously observed surge in adsorbed oxygen species, collectively boosting reactive oxygen species generation (e.g., •O<sub>2</sub><sup>−</sup>, •OH).

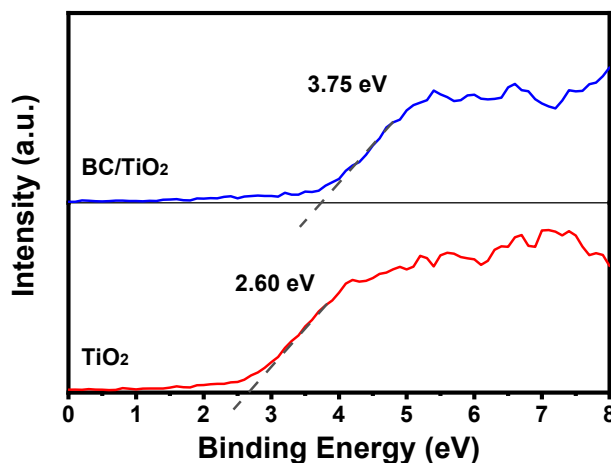

**Figure S3.** XPS valence band spectra of the mineral particles

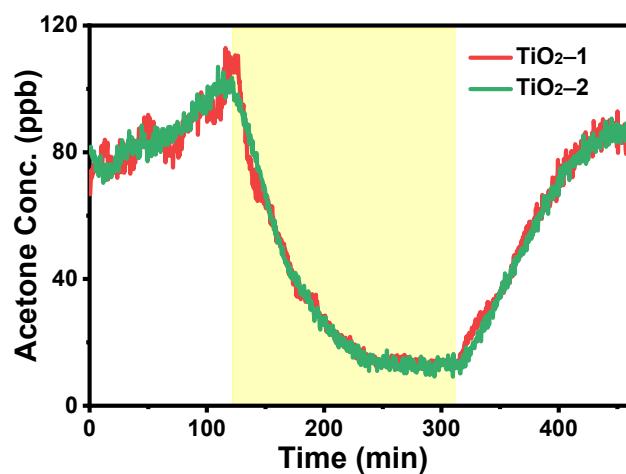

**Figure S4.** Time-dependent concentration profiles of gaseous acetone over TiO<sub>2</sub> from independent replicate experiments conducted in a flow tube experiment, the yellow window highlights the intervals under UV light ( $\lambda_{\text{max}} = 365 \text{ nm}$ ,  $2.0 \text{ mW cm}^{-2}$ ).

The minimal decrease ( $\sim 1$  ppb) upon illumination and weak recovery after darkening indicate no significant photocatalytic activity of BC alone.

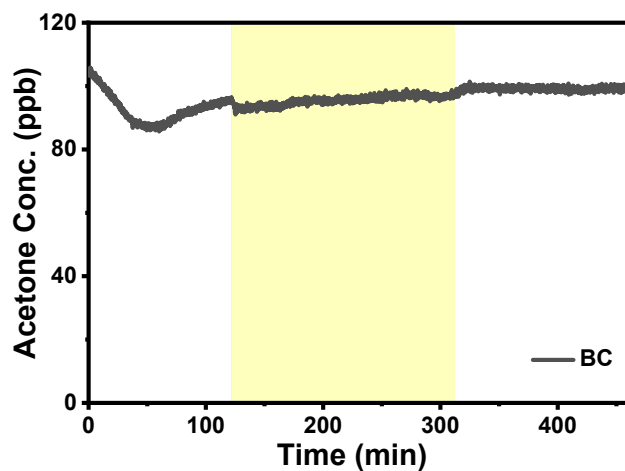

**Figure S5.** Time-dependent acetone concentration profile in the presence of BC only under UV light irradiation ( $\lambda_{\text{max}} = 365$  nm,  $2.0 \text{ mW cm}^{-2}$ ).

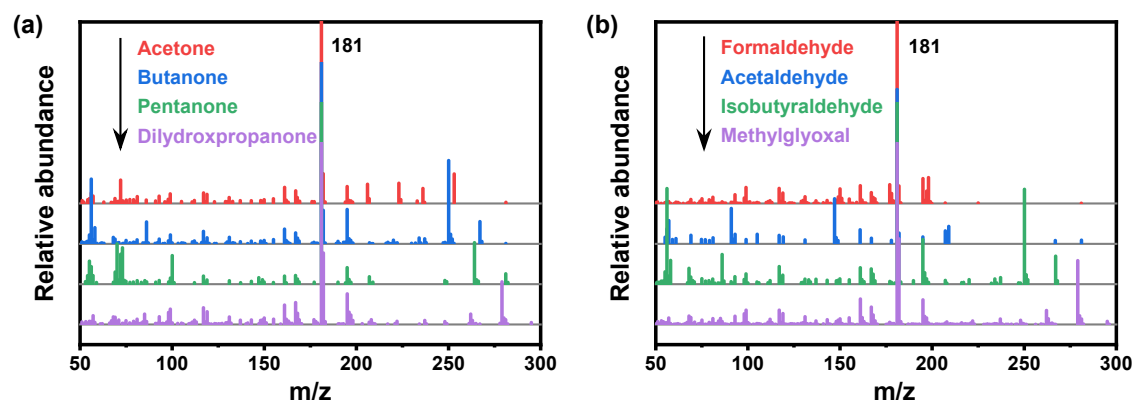

**Figure S6.** Major products accumulated on  $\text{TiO}_2$  surface

**Table S1.** Relative composition of O 1s species from XPS spectral deconvolution for the mineral particles.

| Dust                | O 1s                             | Test 1 (%) | Test 2 (%) | Test 3 (%) | Mean $\pm$ SD (%) |
|---------------------|----------------------------------|------------|------------|------------|-------------------|
| TiO <sub>2</sub>    | O <sub>latt.</sub><br>(530.8 eV) | 52.5       | 53.8       | 52.7       | 53.0 $\pm$ 0.7    |
|                     | O <sub>ads.</sub><br>(530.5 eV)  | 18.2       | 16.9       | 17.7       | 17.6 $\pm$ 0.7    |
|                     | O <sub>H2O</sub><br>(531.4 eV)   | 29.3       | 30.1       | 28.8       | 29.4 $\pm$ 0.7    |
| BC/TiO <sub>2</sub> | O <sub>latt.</sub><br>(529.9 eV) | 37.9       | 35.2       | 37.0       | 36.7 $\pm$ 1.4    |
|                     | O <sub>ads.</sub><br>(531.3 eV)  | 46.3       | 44.8       | 45.7       | 45.6 $\pm$ 0.8    |
|                     | O <sub>H2O</sub><br>(532.7 eV)   | 18.5       | 17.0       | 17.6       | 17.7 $\pm$ 0.8    |

**Note:** Values are presented as mean  $\pm$  standard deviation (SD) from  $n = 3$  independent measurements

To assess the statistical significance of the differences in oxygen species distribution between TiO<sub>2</sub> and BC/TiO<sub>2</sub> samples, a one-way analysis of variance (ANOVA) was performed on the O 1s XPS data presented in **Table S1**. Each sample group consisted of three independent measurements ( $n = 3$ ). The ANOVA results revealed extremely significant differences ( $p < 0.001$ ) for all three oxygen species.

To evaluate the statistical significance of the differences in oxygen species distribution between TiO<sub>2</sub> and BC/TiO<sub>2</sub> samples, a one-way analysis of variance (ANOVA) was conducted on the O 1s XPS data from **Table S1**, with three independent



measurements per group ( $n = 3$ ). The ANOVA compared the mean values of each oxygen species ( $O_{\text{latt.}}$ ,  $O_{\text{ads.}}$ , and  $O_{\text{H}_2\text{O}}$ ) between the two sample types.

The ANOVA procedure involved calculating the following for each oxygen species:

(1) The between-group variance ( $MS_{\text{between}}$ ), based on the squared deviations of group means from the overall mean.

(2) The within-group variance ( $MS_{\text{within}}$ ), derived from the variability of individual measurements around their respective group means.

(3) The F-statistic, computed as the ratio  $MS_{\text{between}} / MS_{\text{within}}$ .

The results showed extremely significant differences for all oxygen species ( $p < 0.001$ ).

Specifically:

For  $O_{\text{latt.}}$ :  $F = 334.9$ ,  $p = 3.8 \times 10^{-6}$

For  $O_{\text{ads.}}$ :  $F = 2485.3$ ,  $p = 4.8 \times 10^{-7}$

For  $O_{\text{H}_2\text{O}}$ :  $F = 410.7$ ,  $p = 2.9 \times 10^{-6}$

These results confirm that BC incorporation significantly alters the surface oxygen chemistry of  $\text{TiO}_2$ . The pronounced increase in  $O_{\text{ads.}}$  and decrease in both  $O_{\text{latt.}}$  and  $O_{\text{H}_2\text{O}}$  in BC/ $\text{TiO}_2$  are statistically robust. These changes align with the formation of Ti–O–C bonds and electron redistribution, which enhance surface reactivity and promote ROS generation, as discussed in the main text. The high statistical significance ( $p < 0.001$ ) underscores the reliability of these trends.

**Table S2.** Contact angle measurements of TiO<sub>2</sub> and BC/TiO<sub>2</sub> Samples

| Sample              | Contact Angle Measurements (°) |        |        |        |        | Mean (°) | SD <sup>a</sup> (°) |
|---------------------|--------------------------------|--------|--------|--------|--------|----------|---------------------|
|                     | Test 1                         | Test 2 | Test 3 | Test 4 | Test 5 |          |                     |
| TiO <sub>2</sub>    | 24.8                           | 25.6   | 26.0   | 25.5   | 25.9   | 25.6     | 0.47                |
| BC/TiO <sub>2</sub> | 35.6                           | 37.5   | 37.0   | 37.2   | 36.7   | 36.8     | 0.73                |

<sup>a</sup> Standard Deviation

The mean values were used to calculate the ~44% increase in hydrophobicity. The standard deviation represents the variability in the measurements.

To rigorously evaluate the significance of this difference, an unpaired two-sample t-test assuming equal variances was performed. The calculations are summarized below:

(1) Pooled variance:

$$s_p^2 = \frac{(n_1 - 1)s_1^2 + (n_2 - 1)s_2^2}{n_1 + n_2 - 2} = \frac{4 \times (0.47)^2 + 4 \times (0.73)^2}{8} = 0.3769$$

(2) Standard error of the difference:

$$SE = s_p \sqrt{\frac{1}{n_1} + \frac{1}{n_2}} = \sqrt{0.3769} \times \sqrt{0.4} \approx 0.388$$

(3) t-statistic:

$$t = \frac{\bar{X}_2 - \bar{X}_1}{SE} = \frac{36.8 - 25.6}{0.388} \approx 28.87$$

(4) Degrees of freedom:

$$df = n_1 + n_2 - 2 = 8$$

The resulting t-value is 28.87, which corresponds to a p-value much less than 0.001. This confirms that the observed enhancement in hydrophobicity upon BC incorporation is statistically highly significant.
